# Supplementary material for: Telemedicine as an alternative way to access abortion in Italy and characteristics of requests during the COVID-19 pandemic
Source: HighWire-hosted journal article supplement (doi:10.1136/bmjsrh-2021-201281), 2021-10-25
Supplement: bmjsrh-2021-201281supp001_data_supplement.pdf [file bmjsrh-2021-201281supp001_data_supplement.pdf]

**Supplementary Table 1: Current pregnancy – teenagers vs. all other age groups**

|                                                            | Teenagers (n=61) | Not Teenagers (n=717) | P Value       |
|------------------------------------------------------------|------------------|-----------------------|---------------|
|                                                            | % (n)            |                       |               |
| <b>Gest. Age</b>                                           |                  |                       |               |
| < 7 weeks                                                  | 14.8% (9)        | 33% (236)             | <b>0.003</b>  |
| 7-10 weeks                                                 | 85.2% (52)       | 67% (481)             |               |
| <b>Ultrasound</b>                                          |                  |                       |               |
| Yes                                                        | 13.1% (8)        | 25.7% (184)           | <b>0.029</b>  |
| No                                                         | 86.9% (53)       | 74.3% (533)           |               |
| <b>Access to hospital</b>                                  |                  |                       |               |
| Yes                                                        | 70.5% (43)       | 87.4% (627)           | <b>0.0001</b> |
| No                                                         | 29.5% (18)       | 12.6% (90)            |               |
| <b>Blood type knowledge</b>                                |                  |                       |               |
| Yes                                                        | 39.3% (24)       | 73.4% (526)           | <b>0.0001</b> |
| No                                                         | 60.7% (37)       | 26.6% (191)           |               |
| <b>Pregnancy test</b>                                      |                  |                       |               |
| No, but I did an ultrasound and I am pregnant              | 0% (0)           | 4.9% (35)             | 0.102         |
| No, I did not do a pregnancy test                          | 21.3% (13)       | 4.9% (35)             | <b>0.0001</b> |
| Yes, and I am pregnant                                     | 78.7% (48)       | 90.2% (647)           | <b>0.005</b>  |
| <b>Cause of Pregnancy</b>                                  |                  |                       |               |
| I did not use contraceptives                               | 35% (21)         | 53.7% (379)           | <b>0.006</b>  |
| I wanted a pregnancy at first but my situation changed     | 0% (0)           | 0.3% (2)              | 1             |
| I was raped                                                | 10% (6)          | 2.8% (20)             | <b>0.003</b>  |
| The contraceptives I used did not work                     | 55% (33)         | 43.2% (305)           | 0.08          |
| <b>Reason for Abortion<br/>(multiple answers accepted)</b> |                  |                       |               |
| I have no money to raise a child                           | 50.8% (31)       | 34% (265)             | <b>0.032</b>  |
| I want to finish school                                    | 78.7% (48)       | 8.1% (58)             | <b>0.0001</b> |
| I am too young                                             | 85.2% (52)       | 11.7% (84)            | <b>0.0001</b> |
| I just cannot have a child at this point in my life        | 57.4% (35)       | 65.8% (472)           | 0.183         |
| I am ill                                                   | 0% (0)           | 0.7% (5)              | 1             |
| I am too old                                               | 0% (0)           | 4.6% (33)             | 0.101         |
| My family is complete                                      | 0% (0)           | 19.9% (143)           | <b>0.0001</b> |
| My partner does not want a child                           | 0% (0)           | 1.1% (8)              | 1             |
| <b>Company during abortion</b>                             |                  |                       |               |
| Yes                                                        | 95.1% (58)       | 92.6% (664)           | 0.612         |
| No                                                         | 4.9% (3)         | 7.4% (53)             |               |
| <b>Request status</b>                                      |                  |                       |               |
| Cancelled                                                  | 90.2% (55)       | 66.5% (477)           | <b>0.006</b>  |
| Delivered                                                  | 9.8% (6)         | 33.5% (240)           |               |

**Supplementary Table 2: Reason for not having and ultrasound and for using Women on Web – teenagers vs. all other age groups**

|                                                                                                  | Teenagers (n=61) | Not Teenagers (n=717) | P Value       |
|--------------------------------------------------------------------------------------------------|------------------|-----------------------|---------------|
|                                                                                                  | % (n)            |                       |               |
| <b>Reason for no ultrasound</b><br>(multiple answers accepted)                                   |                  |                       |               |
| I cannot afford one                                                                              | 44.3% (27)       | 26.2% (188)           | <b>0.002</b>  |
| I cannot get to a clinic because of lack of transportation                                       | 18% (11)         | 7.4% (53)             | <b>0.004</b>  |
| I did not know that I needed one                                                                 | 3.3% (2)         | 3.3% (24)             | 1             |
| I am afraid my partner or other people will find out                                             | 39.3% (24)       | 23.4% (168)           | <b>0.006</b>  |
| I just did not have time to do it                                                                | 4.9% (3)         | 7.9% (57)             | 0.615         |
| I am unsure where to get one                                                                     | 4.9% (3)         | 2.4% (17)             | 0.202         |
| I thought I did not need one as I am sure I am pregnant and I know how long I have been pregnant | 23% (14)         | 25.1% (180)           | 0.709         |
| <b>Reason for using Women on Web</b>                                                             |                  |                       |               |
| <sup>a</sup> It is hard for me to access abortion because of...                                  |                  |                       |               |
| <sup>b</sup> I prefer to access abortion through WoW because...<br>(multiple answers accepted)   |                  |                       |               |
| <sup>a</sup> Coronavirus                                                                         | 24.6% (15)       | 25% (179)             | 0.948         |
| <sup>a</sup> Legal restrictions                                                                  | 19.7% (12)       | 11% (79)              | <b>0.043</b>  |
| <sup>a</sup> Cost                                                                                | 6.6% (4)         | 8.1% (58)             | 0.81          |
| <sup>a</sup> Stigma                                                                              | 29.5% (18)       | 11.2% (80)            | <b>0.0001</b> |
| <sup>a</sup> Distance                                                                            | 8.2% (5)         | 9.5% (68)             | 1             |
| <sup>a</sup> Childcare                                                                           | 1.6% (1)         | 17.4% (125)           | <b>0.0001</b> |
| <sup>a</sup> Work or school commitments                                                          | 31.1% (19)       | 13.9% (100)           | <b>0.0001</b> |
| <sup>a</sup> I need to keep my abortion a secret from my partner or family                       | 59% (36)         | 38.5% (276)           | <b>0.002</b>  |
| <sup>a</sup> My partner is abusive                                                               | 3.3% (2)         | 4% (29)               | 1             |
| <sup>a</sup> Protestors                                                                          | 11.5% (7)        | 12.1% (87)            | 0.88          |
| <sup>b</sup> I would rather take care my own abortion                                            | 39.3% (24)       | 31.8% (228)           | 0.277         |
| <sup>b</sup> Abortion pills are not available in my country                                      | 8.2% (5)         | 5.6% (40)             | 0.388         |
| <sup>b</sup> I would be more comfortable at home                                                 | 37.8% (23)       | 34.7% (249)           | 0.64          |
| <sup>b</sup> I would rather have my partner or friend with me during the process                 | 34.4% (21)       | 18% (129)             | <b>0.002</b>  |
| <sup>b</sup> I would rather keep my abortion private                                             | 44.2% (27)       | 35.6% (255)           | 0.175         |
| <sup>b</sup> I find it empowering                                                                | 9.8% (6)         | 7.1% (51)             | 0.433         |
| <sup>a</sup> I am an undocumented immigrant                                                      | 1.6% (1)         | 6.3% (45)             | 0.25          |
| Other reason                                                                                     | 0% (0)           | 1.8% (13)             | 0.614         |
